# Supplementary material for: NFκB signaling drives pro-granulocytic astroglial responses to neuromyelitis optica patient IgG
Source: PubMed Central journal article supplement (PMC4590277; doi:10.1186/s12974-015-0403-8), 2015-09-30
Supplement: 12974_2015_403_MOESM2_ESM.pdf [file 12974_2015_403_MOESM2_ESM.pdf]

**Table S2:** Representative NMO serum pool. NMO patient sera were pooled from 5 males and 36 females ranging in age from 14 to 79, with a median age of 48.

| <b>S2. NMO patient cohort for serum collection and NMO IgG isolation (2014 pool)</b> |            |            |            |
|--------------------------------------------------------------------------------------|------------|------------|------------|
| <b>Sample ID</b>                                                                     | <b>Sex</b> | <b>DOB</b> | <b>Age</b> |
| 082                                                                                  | M          | 12/31/1953 | 59         |
| 083                                                                                  | F          | 5/15/1993  | 20         |
| 084                                                                                  | F          | 8/20/1943  | 69         |
| 085                                                                                  | F          | 10/27/1956 | 56         |
| 086                                                                                  | F          | 2/18/1942  | 71         |
| 087                                                                                  | F          | 12/11/1992 | 20         |
| 088                                                                                  | F          | 11/18/1941 | 71         |
| 089                                                                                  | M          | 6/13/1946  | 67         |
| 090                                                                                  | F          | 1/24/1968  | 45         |
| 091                                                                                  | F          | 6/26/1943  | 70         |
| 092                                                                                  | F          | 2/4/1999   | 14         |
| 093                                                                                  | F          | 9/27/1955  | 57         |
| 094                                                                                  | M          | 3/2/1978   | 35         |
| 095                                                                                  | F          | 9/20/1963  | 49         |
| 096                                                                                  | F          | 7/26/1969  | 44         |
| 097                                                                                  | F          | 5/15/1993  | 20         |
| 098                                                                                  | F          | 8/24/1985  | 27         |
| 099                                                                                  | F          | 9/20/1963  | 49         |
| 100                                                                                  | F          | 1/1/1941   | 72         |
| 101                                                                                  | F          | 6/17/1988  | 25         |
| 102                                                                                  | F          | 6/18/1963  | 50         |
| 103                                                                                  | F          | 1/3/1965   | 48         |
| 104                                                                                  | F          | 2/18/1942  | 71         |
| 105                                                                                  | F          | 5/3/1979   | 35         |
| 106                                                                                  | M          | 6/6/1958   | 55         |
| 107                                                                                  | F          | 9/11/1984  | 29         |
| 108                                                                                  | F          | 3/8/1989   | 25         |
| 109                                                                                  | F          | 7/12/1951  | 62         |
| 110                                                                                  | F          | 12/20/1983 | 30         |
| 111                                                                                  | F          | 9/20/1966  | 47         |
| 112                                                                                  | F          | 10/26/1972 | 41         |
| 113                                                                                  | F          | 6/14/1972  | 41         |
| 114                                                                                  | F          | 12/21/1962 | 51         |
| 115                                                                                  | F          | 2/6/1986   | 28         |
| 116                                                                                  | F          | 4/24/1971  | 43         |
| 117                                                                                  | F          | 2/29/1988  | 26         |
| 118                                                                                  | F          | 2/13/1941  | 73         |
| 119                                                                                  | F          | 10/17/1933 | 79         |
| 120                                                                                  | F          | 10/24/1943 | 70         |
| 121                                                                                  | M          | 12/7/1994  | 19         |
| 122                                                                                  | F          | 9/24/1965  | 48         |
