# Supplementary material for: NFκB signaling drives pro-granulocytic astroglial responses to neuromyelitis optica patient IgG
Source: Springer Nature journal article supplement (doi:10.1186/s12974-015-0403-8), 2015-09-30
Supplement: MOESM1 [file 9768862]

**Table S1:** NMO serum pools used in this study.

| <b>S1. Study pools: NMO</b> |                          |                        |                  |                                         |
|-----------------------------|--------------------------|------------------------|------------------|-----------------------------------------|
| <b>year</b>                 | <b># female patients</b> | <b># male patients</b> | <b>age range</b> | <b>IgG yield</b>                        |
| 2011                        | 15                       | 0                      | 32-77            | #1 @ 15.5 mg/mL                         |
| 2012                        | 20                       | 5                      | 9-69             | #1 @ 18.8 mg/mL<br>#2 @ 22 mg/mL        |
| 2013                        | 20                       | 3                      | 14-72            | #1 @ 56 mg/mL (conc)<br>#2 @ 20.7 mg/mL |
| 2014                        | 36                       | 5                      | 14-79            | #1 @ 12.7 mg/mL<br>#2 @ 14.3 mg/mL      |
| 2015                        | 38                       | 7                      | 19-75            | #1 @ 19.4 mg/mL<br>#2 @ 23.2 mg/mL      |
