# Supplementary material for: NFκB signaling drives pro-granulocytic astroglial responses to neuromyelitis optica patient IgG
Source: Springer Nature journal article supplement (doi:10.1186/s12974-015-0403-8), 2015-09-30
Supplement: MOESM3 [file 9768862]

**Table S3:** Control sera were pooled from age- and sex-matched donors.

| <b>S3. CON patient cohort for serum collection and CON IgG isolation</b> |            |            |            |
|--------------------------------------------------------------------------|------------|------------|------------|
| <b>Sample ID</b>                                                         | <b>Sex</b> | <b>DOB</b> | <b>Age</b> |
| 058                                                                      | M          | 12/31/1953 | 59         |
| 059                                                                      | F          | 5/15/1993  | 20         |
| 060                                                                      | F          | 8/20/1943  | 69         |
| 061                                                                      | F          | 10/27/1956 | 56         |
| 062                                                                      | F          | 2/18/1942  | 71         |
| 063                                                                      | F          | 12/11/1992 | 20         |
| 064                                                                      | F          | 11/18/1941 | 71         |
| 065                                                                      | M          | 6/13/1946  | 67         |
| 066                                                                      | F          | 1/24/1968  | 45         |
| 067                                                                      | F          | 6/26/1943  | 70         |
| 068                                                                      | F          | 2/20/1961  | 52         |
| 069                                                                      | F          | 2/4/1999   | 14         |
| 070                                                                      | F          | 9/27/1955  | 57         |
| 071                                                                      | M          | 3/2/1978   | 35         |
| 072                                                                      | F          | 9/20/1963  | 49         |
| 073                                                                      | F          | 7/26/1969  | 44         |
| 074                                                                      | F          | 5/15/1993  | 20         |
| 075                                                                      | F          | 8/24/1985  | 27         |
| 076                                                                      | F          | 9/20/1963  | 49         |
| 077                                                                      | F          | 1/1/1941   | 72         |
| 078                                                                      | F          | 6/17/1988  | 25         |
| 079                                                                      | F          | 6/18/1963  | 50         |
| 080                                                                      | F          | 1/3/1965   | 48         |
| 081                                                                      | F          | 2/18/1942  | 71         |
| 058                                                                      | M          | 12/31/1953 | 59         |
| 059                                                                      | F          | 5/15/1993  | 20         |
| 060                                                                      | F          | 8/20/1943  | 69         |
| 061                                                                      | F          | 10/27/1956 | 56         |
| 062                                                                      | F          | 2/18/1942  | 71         |
| 063                                                                      | F          | 12/11/1992 | 20         |
| 064                                                                      | F          | 11/18/1941 | 71         |
| 065                                                                      | M          | 6/13/1946  | 67         |
| 066                                                                      | F          | 1/24/1968  | 45         |
| 067                                                                      | F          | 6/26/1943  | 70         |
| 068                                                                      | F          | 2/20/1961  | 52         |
| 069                                                                      | F          | 2/4/1999   | 14         |
| 070                                                                      | F          | 9/27/1955  | 57         |
| 071                                                                      | M          | 3/2/1978   | 35         |
| 072                                                                      | F          | 9/20/1963  | 49         |
| 073                                                                      | F          | 7/26/1969  | 44         |
| 074                                                                      | F          | 5/15/1993  | 20         |
