# Supplementary material for: NFκB signaling drives pro-granulocytic astroglial responses to neuromyelitis optica patient IgG
Source: Springer Nature journal article supplement (doi:10.1186/s12974-015-0403-8), 2015-09-30
Supplement: MOESM5 [file 9768862]

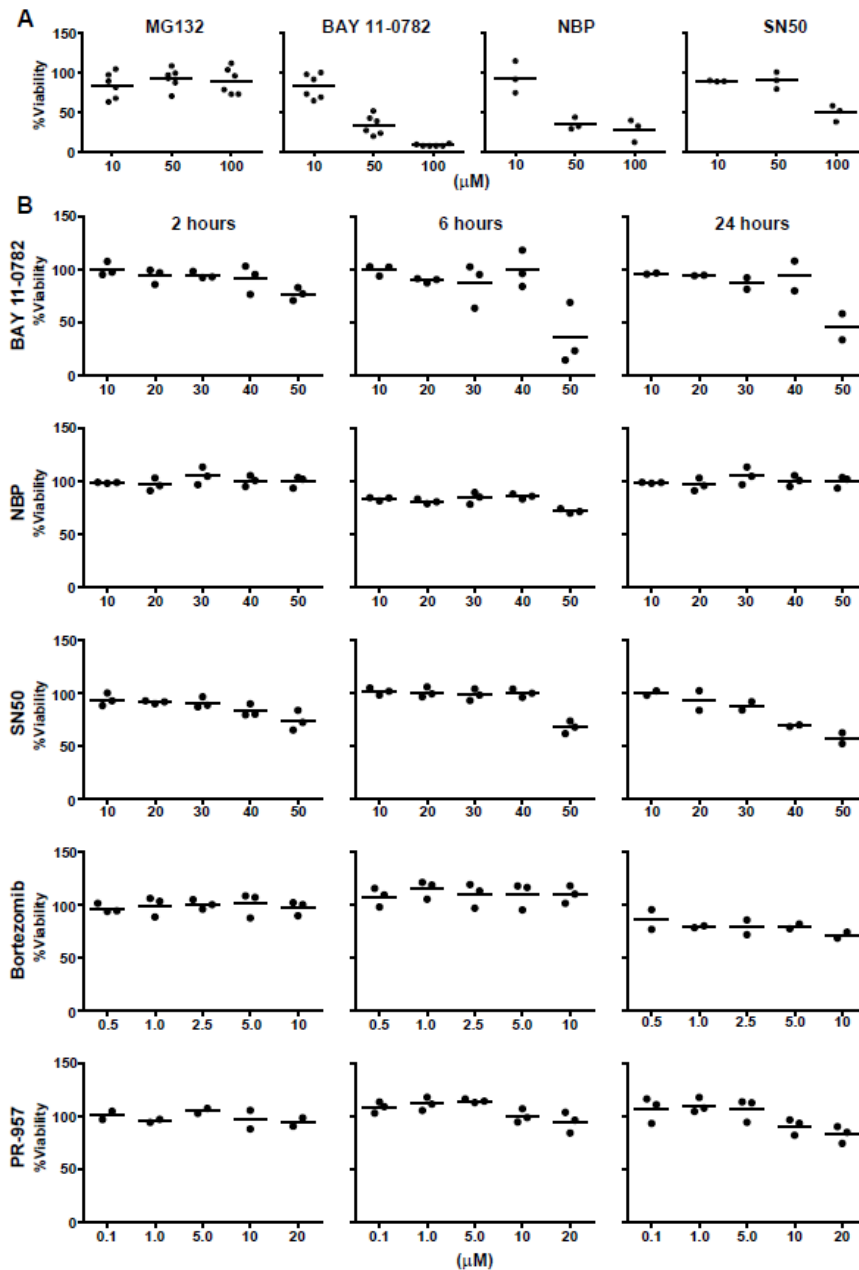

**Supplementary Figure 2. Assessment of cell viability during NF $\kappa$ B and proteasome inhibitor treatment.** A standard colorimetric MTT assay was used to assess cell viability following treatment with different concentrations of the NF $\kappa$ B inhibitors employed in our study. (A) Cells were exposed to high concentrations (10, 50, 100  $\mu\text{M}$ ) of MG132, BAY 11-0782, NBP, and SN50 for 24 hours. (B) Cell viability was determined using an extended concentration curve (shown in  $\mu\text{M}$ ) and multiple time points (2, 6, 24 hours) for BAY 11-0782, NBP, SN50, bortezomib and PR-957. Data are representative of 1-2 separate experiments performed in duplicate or triplicate. Each dot represents an individual well. Percent viability was calculated as (sample absorbance/untreated absorbance)\*100.
